# Supplementary material for: PDL2+ CD11b+ dermal dendritic cells capture topical antigen through hair follicles to prime LAP+ Tregs
Source: PubMed Central journal article supplement (PMC6286332; doi:10.1038/s41467-018-07716-7), 2018-12-07
Supplement: 41467_2018_7716_MOESM3_ESM.pdf [file 41467_2018_7716_MOESM3_ESM.pdf]

## **Description of Additional Supplementary Files**

File Name: Supplementary Data 1

Description: Excel file providing data for Figure 1A,B,C

File Name: Supplementary Data 2

Description: Excel file providing data for Figure 2B,C,D,E,G

File Name: Supplementary Data 3

Description: Excel file providing data for Figure 3B

File Name: Supplementary Data 4

Description: Excel file providing data for Figure 4A-E

File Name: Supplementary Data 5

Description: Excel file providing data for Figure 5B-C

File Name: Supplementary Data 6

Description: Excel file providing data for Figure 6A-C

File Name: Supplementary Data 7

Description: Excel file providing data for Figure 7A,C

File Name: Supplementary Data 8

Description: Excel file providing data for Figure 8B,C
